# Supplementary material for: Effects of the SARS-CoV‑2 pandemic on residency training in orthopedics and traumatology in Germany
Source: Springer Nature journal article supplement (doi:10.1007/s00132-022-04295-w), 2022-08-25
Supplement: MOESM1 [file 23403728]

## Effects of the SARS-CoV-2 Pandemic on the Residency Training in Orthopedics and Traumatology after nearly two years in Germany – A Nationwide Survey

Eine Umfrage des Centrums für Muskuloskeletale Chirurgie (CMSC) der Charité –  
Universitätsmedizin Berlin

Dominik Adl Amini                      dominik.adl-amini@charite.de

Maximilian Müllner                    maximilian.muellner@charite.de

| I)                                                        | Welche Auswirkungen hatte die COVID-19 Pandemie auf Ihre Ausbildung im letzten Jahr?                                                                                                                                                                                   | Trifft zu                | Nicht zu beantworten     | Trifft nicht zu          |
|-----------------------------------------------------------|------------------------------------------------------------------------------------------------------------------------------------------------------------------------------------------------------------------------------------------------------------------------|--------------------------|--------------------------|--------------------------|
| <b>A) Allgemeiner Klinikalltag/stationäre Versorgung:</b> |                                                                                                                                                                                                                                                                        |                          |                          |                          |
| 1.                                                        | War es Ihnen im letzten Jahr trotz der Einschränkungen durch die Pandemie (z.B. Kontaktbeschränkungen) ausreichend möglich, mit Ihren Weiterbildungsverantwortlichen klinische Entscheidungen zu schwierigen ambulanten und stationären Patientenfällen zu besprechen? | <input type="checkbox"/> | <input type="checkbox"/> | <input type="checkbox"/> |
| 2.                                                        | Fanden in Ihrer Abteilung im letzten Jahr regelmäßige Frühbesprechungen mit der Möglichkeit der Teilnahme des kompletten Teams statt? (auch virtuell/online)                                                                                                           | <input type="checkbox"/> | <input type="checkbox"/> | <input type="checkbox"/> |
| 3.                                                        | Fanden in Ihrer Abteilung im letzten Jahr regelmäßige Fallbesprechungen <u>der bereits operierten Patienten</u> mit der Möglichkeit der Teilnahme des kompletten verfügbaren Teams statt? (Nachbesprechung)                                                            | <input type="checkbox"/> | <input type="checkbox"/> | <input type="checkbox"/> |
| 4.                                                        | Fanden in Ihrer Abteilung im letzten Jahr regelmäßige Fallbesprechungen <u>der noch zu operierenden Patienten</u> mit der Möglichkeit der Teilnahme des kompletten verfügbaren Teams statt? (Indikationsbesprechung)                                                   | <input type="checkbox"/> | <input type="checkbox"/> | <input type="checkbox"/> |

|              |                                                                                                                                                                                                                                                                        |                              |                          |                          |
|--------------|------------------------------------------------------------------------------------------------------------------------------------------------------------------------------------------------------------------------------------------------------------------------|------------------------------|--------------------------|--------------------------|
| 5.           | Wurden Sie „fachfremd“ in anderen Abteilungen/Stationen für die Versorgung von COVID-19 Patienten für eine Dauer von mindestens einem Monat eingesetzt?                                                                                                                | <input type="checkbox"/>     | <input type="checkbox"/> | <input type="checkbox"/> |
| 5.1          | Falls zutreffend, wie viele Monate wurden Sie dort insgesamt eingesetzt?                                                                                                                                                                                               | Bitte Anzahl hier eintragen: |                          |                          |
| 6.           | Gab es in Ihrer Abteilung im letzten Jahr eine Team-Teilung des Personals für mindestens einen Monat?<br><br>(Jeweils ein von der Arbeit freigestelltes Team von Ärztinnen/Ärzten, welches im Falle einer Infektion innerhalb des arbeitenden Teams einspringen kann.) | <input type="checkbox"/>     | <input type="checkbox"/> | <input type="checkbox"/> |
| 7.           | Konnten in Ihrer Abteilung im letzten Jahr Ärztinnen/Ärzte in Weiterbildung diese pandemiebedingt nur verzögert beenden, da vorübergehend keine Facharztprüfungen angeboten wurden?                                                                                    | <input type="checkbox"/>     | <input type="checkbox"/> | <input type="checkbox"/> |
| <b>B) OP</b> |                                                                                                                                                                                                                                                                        |                              |                          |                          |
| 1.           | Operierten in Ihrer Abteilung im letzten Jahr aufgrund von Zeitdruck häufiger erfahrene Ärzte (Fachärztin/Arzt, Oberärztin/Arzt, Chefärztin/Arzt)?                                                                                                                     | <input type="checkbox"/>     | <input type="checkbox"/> | <input type="checkbox"/> |
| 2.           | Hatten Sie im letzten Jahr die Möglichkeit aktiv an Operationen teilzunehmen?                                                                                                                                                                                          | <input type="checkbox"/>     | <input type="checkbox"/> | <input type="checkbox"/> |
| 3.           | Um wieviel Prozent (%) hat sich Ihre Ausbildung im OP im letzten Jahr verändert?<br><b>(Bei weniger: „- X%“; bei mehr: „+ X%“; bei keiner Reduktion, bitte „0%“ angeben!)</b>                                                                                          | Bitte Anzahl hier eintragen: |                          |                          |

| <b>C) Fort- und Weiterbildungen</b> |                                                                                                                                                                                                                                              |                              |                          |                          |
|-------------------------------------|----------------------------------------------------------------------------------------------------------------------------------------------------------------------------------------------------------------------------------------------|------------------------------|--------------------------|--------------------------|
| 1.                                  | Gab es in Ihrer Abteilung im letzten Jahr eine Änderung der Anzahl an <b>internen</b> Fort- und Weiterbildungen im Vergleich zu dem Vorjahr?                                                                                                 | <input type="checkbox"/>     | <input type="checkbox"/> | <input type="checkbox"/> |
| 1.1                                 | Falls zutreffend, um wieviel Prozent haben sich diese <b>internen</b> Fort- und Weiterbildungen im letzten Jahr laut Ihrer Schätzung verändert?<br><b>(Bei weniger: „- X%“; bei mehr: „+ X%“; bei keiner Reduktion, bitte „0%“ angeben!)</b> | Bitte Anzahl hier eintragen: |                          |                          |
| 1.2                                 | Falls zutreffend, wieviel Prozent dieser <b>internen</b> Fort- und Weiterbildungen sind im letzten Jahr ohne Nachholtermin ausgefallen?                                                                                                      | Bitte Anzahl hier eintragen: |                          |                          |
| 2.                                  | Haben Sie im letzten Jahr geplante <b>externe</b> Fortbildungen und Kurse pandemiebedingt nicht besuchen können (z.B. AE-, ATLS-, AO- oder Röntgen-Kurse)?                                                                                   | <input type="checkbox"/>     | <input type="checkbox"/> | <input type="checkbox"/> |
| 2.1                                 | Falls zutreffend, wieviel Prozent dieser <b>externen</b> Fort- und Weiterbildungen sind im letzten Jahr ohne Nachholtermin ausgefallen?                                                                                                      | Bitte Anzahl hier eintragen: |                          |                          |
| <b>D) Kongresse</b>                 |                                                                                                                                                                                                                                              |                              |                          |                          |
| 1.                                  | Haben Sie im letzten Jahr virtuell an Kongressen teilgenommen?                                                                                                                                                                               | <input type="checkbox"/>     | <input type="checkbox"/> | <input type="checkbox"/> |
| 2.                                  | Wurden im letzten Jahr Kongresse, an denen Sie teilnehmen wollten (physisch oder virtuell), ohne Nachholtermin abgesagt?                                                                                                                     | <input type="checkbox"/>     | <input type="checkbox"/> | <input type="checkbox"/> |
| 3.                                  | Wie viele Kongresse, an denen Sie im letzten Jahr teilnehmen wollten, wurden abgesagt?                                                                                                                                                       | Bitte Anzahl hier eintragen: |                          |                          |
| <b>E) Wissenschaft</b>              |                                                                                                                                                                                                                                              |                              |                          |                          |
| 1.                                  | Hatten Sie die Möglichkeit im letzten Jahr Zeit in Forschungsprojekte zu investieren?                                                                                                                                                        | <input type="checkbox"/>     | <input type="checkbox"/> | <input type="checkbox"/> |
| 1.2                                 | Falls zutreffend, wieviel Prozent Ihrer Zeit konnten Sie in Forschungsprojekte investieren?<br><b>(Bei weniger: „- X%“; bei mehr: „+ X%“; bei keiner Reduktion, bitte „0%“ angeben!)</b>                                                     | Bitte Anzahl hier eintragen: |                          |                          |

|     |                                                                                                                                                                                             |                              |                          |                          |
|-----|---------------------------------------------------------------------------------------------------------------------------------------------------------------------------------------------|------------------------------|--------------------------|--------------------------|
| 2.  | Gab es im letzten Jahr in Ihrer Abteilung im Vergleich zu den Vorjahren, eine Änderung der Anzahl von Forschungsprojekte/-vorhaben, die neu erarbeitet wurden?                              | <input type="checkbox"/>     | <input type="checkbox"/> | <input type="checkbox"/> |
| 2.1 | Falls zutreffend, um wieviel Prozent änderte sich die Anzahl von Forschungsprojekte/-vorhaben?<br><b>(Bei weniger: „- X%“; bei mehr: „+ X%“; bei keiner Reduktion, bitte „0%“ angeben!)</b> | Bitte Anzahl hier eintragen: |                          |                          |
| 3.  | Wurden im letzten Jahr pandemiebedingt bereits laufende Studien, an denen Sie mitarbeiten, pausiert?                                                                                        | <input type="checkbox"/>     | <input type="checkbox"/> | <input type="checkbox"/> |

| <b>II)</b> | <b>Wie bewerten Sie folgende Aussagen?</b>                                                                                         | <b>Stimme voll zu</b>    | <b>Stimme eher zu</b>    | <b>Neutral</b>           | <b>Lehne eher ab</b>     | <b>Lehne völlig ab</b>   |
|------------|------------------------------------------------------------------------------------------------------------------------------------|--------------------------|--------------------------|--------------------------|--------------------------|--------------------------|
| <b>A)</b>  | <b>Klinik/OP/Wissenschaft</b>                                                                                                      |                          |                          |                          |                          |                          |
| 1.         | Durch die Einschränkungen der Pandemie wurde ich in meiner allgemeinen Ausbildung (klinisch und operativ) zeitlich zurückgeworfen. | <input type="checkbox"/> | <input type="checkbox"/> | <input type="checkbox"/> | <input type="checkbox"/> | <input type="checkbox"/> |
| 2.         | Im letzten Jahr hat sich meine operative Ausbildung pandemiebedingt verzögert.                                                     | <input type="checkbox"/> | <input type="checkbox"/> | <input type="checkbox"/> | <input type="checkbox"/> | <input type="checkbox"/> |
| 3.         | Im letzten Jahr konnte ich meine wissenschaftliche Karriere vorantreiben.                                                          | <input type="checkbox"/> | <input type="checkbox"/> | <input type="checkbox"/> | <input type="checkbox"/> | <input type="checkbox"/> |
| <b>B)</b>  | <b>Kongresse</b>                                                                                                                   |                          |                          |                          |                          |                          |
| 1.         | Generell betrachtet sind virtuelle Kongresse ein gelungener Ersatz von physischen Kongressen.                                      | <input type="checkbox"/> | <input type="checkbox"/> | <input type="checkbox"/> | <input type="checkbox"/> | <input type="checkbox"/> |

|    |                                                                                                                                 |                          |                          |                          |                          |                          |
|----|---------------------------------------------------------------------------------------------------------------------------------|--------------------------|--------------------------|--------------------------|--------------------------|--------------------------|
| 2. | Wenn ich die Wahl zwischen einem virtuellen und einem physischen Kongress hätte, würde ich einen <u>virtuellen bevorzugen</u> . | <input type="checkbox"/> | <input type="checkbox"/> | <input type="checkbox"/> | <input type="checkbox"/> | <input type="checkbox"/> |
| 3. | Mein Wissenszuwachs ist bei virtuellen Kongressen <u>geringer</u> als bei physischen Kongressen.                                | <input type="checkbox"/> | <input type="checkbox"/> | <input type="checkbox"/> | <input type="checkbox"/> | <input type="checkbox"/> |

| <b>III)</b> | <b>Geben Sie uns eine Einschätzung Ihres Ausblicks auf die Zukunft</b>                        | <b>Stimme voll zu</b>    | <b>Stimme eher zu</b>    | <b>Neutral</b>           | <b>Lehne eher ab</b>     | <b>Lehne völlig ab</b>   |
|-------------|-----------------------------------------------------------------------------------------------|--------------------------|--------------------------|--------------------------|--------------------------|--------------------------|
| 1.          | Ich gehe davon aus, dass sich meine Facharztweiterbildung pandemiebedingt verlängern wird.    | <input type="checkbox"/> | <input type="checkbox"/> | <input type="checkbox"/> | <input type="checkbox"/> | <input type="checkbox"/> |
| 2.          | Ich gehe davon aus, dass ich im kommenden Jahr klinisch umfänglicher ausgebildet werden kann. | <input type="checkbox"/> | <input type="checkbox"/> | <input type="checkbox"/> | <input type="checkbox"/> | <input type="checkbox"/> |
| 3.          | Ich gehe davon aus, dass ich im kommenden Jahr operativ umfänglicher ausgebildet werden kann. | <input type="checkbox"/> | <input type="checkbox"/> | <input type="checkbox"/> | <input type="checkbox"/> | <input type="checkbox"/> |
| 4.          | Ich gehe davon aus, dass ich im kommenden Jahr physisch an Kongressen teilnehmen kann.        | <input type="checkbox"/> | <input type="checkbox"/> | <input type="checkbox"/> | <input type="checkbox"/> | <input type="checkbox"/> |

| IV) Welches Geschlecht haben Sie? |          |                          |
|-----------------------------------|----------|--------------------------|
| 1.                                | Weiblich | <input type="checkbox"/> |
| 2.                                | Männlich | <input type="checkbox"/> |
| 3.                                | Divers   | <input type="checkbox"/> |

| V) Wann haben Sie Geburtstag? |                                          |
|-------------------------------|------------------------------------------|
| 1.                            | Bitte Geburtsdatum eintragen. (TT/MM/JJ) |

| VI) In welcher Position sind Sie aktuell tätig? |                                                                                                       |                          |
|-------------------------------------------------|-------------------------------------------------------------------------------------------------------|--------------------------|
| 1.                                              | Assistenzärztin/Assistenzarzt bzw.<br>Weiterbildungsassistentin/Weiterbildungsassistent in der Praxis | <input type="checkbox"/> |
| 2.                                              | Fachärztin/Facharzt                                                                                   | <input type="checkbox"/> |

| VII) In welchem Ausbildungsjahr sind Sie aktuell?<br>Bei Fachärztinnen/Fachärzten: In welchem Jahr nach dem Erwerb der Facharztqualifikation befinden Sie sich? |  | 1                        | 2                        | 3                        | 4                        | 5                        | 6                        | >6                       |
|-----------------------------------------------------------------------------------------------------------------------------------------------------------------|--|--------------------------|--------------------------|--------------------------|--------------------------|--------------------------|--------------------------|--------------------------|
|                                                                                                                                                                 |  | <input type="checkbox"/> | <input type="checkbox"/> | <input type="checkbox"/> | <input type="checkbox"/> | <input type="checkbox"/> | <input type="checkbox"/> | <input type="checkbox"/> |

| VIII) In welcher Art Einrichtung sind Sie aktuell (überwiegend) tätig? (eine Antwort) |                                                   |                          |
|---------------------------------------------------------------------------------------|---------------------------------------------------|--------------------------|
| 1.                                                                                    | Klinik der Grund- und Regelversorgung             | <input type="checkbox"/> |
| 2.                                                                                    | Klinik mit Schwerpunktversorgung                  | <input type="checkbox"/> |
| 3.                                                                                    | Klinik der Maximalversorgung/Universitätsklinikum | <input type="checkbox"/> |
| 4.                                                                                    | Rehabilitationsklinik                             | <input type="checkbox"/> |
| 5.                                                                                    | Andere                                            | <input type="checkbox"/> |
