# Supplementary material for: Effects of the SARS-CoV‑2 pandemic on residency training in orthopedics and traumatology in Germany
Source: Springer Nature journal article supplement (doi:10.1007/s00132-022-04295-w), 2022-08-25
Supplement: MOESM2 [file 23403728]

## Effects of the SARS-CoV-2 Pandemic on the Residency Training in Orthopedics and Traumatology after nearly two years in Germany – A Nationwide Survey

A survey by the Center for Musculoskeletal Surgery (CMSC) at Charité –  
Universitätsmedizin Berlin

Dominik Adl Amini            dominik.adl-amini@charite.de

Maximilian Muellner        maximilian.muellner@charite.de

| I)                                                     | What impact did the COVID-19 pandemic have on your residency training last year?                                                                                                                                                              | Applicable               | Not to answer            | Not Applicable           |
|--------------------------------------------------------|-----------------------------------------------------------------------------------------------------------------------------------------------------------------------------------------------------------------------------------------------|--------------------------|--------------------------|--------------------------|
| <b>A) General everyday clinical practice and care:</b> |                                                                                                                                                                                                                                               |                          |                          |                          |
| 1.                                                     | Despite the restrictions imposed by the pandemic (e.g., contact restrictions), were you able to adequately discuss clinical decisions regarding difficult outpatient and inpatient cases with your training supervisors during the past year? | <input type="checkbox"/> | <input type="checkbox"/> | <input type="checkbox"/> |
| 2.                                                     | Have there been regular morning meetings in your department in the last year with the possibility of participation of the whole team? (virtually or online)                                                                                   | <input type="checkbox"/> | <input type="checkbox"/> | <input type="checkbox"/> |
| 3.                                                     | Did your department have regular case discussions of the patients awaiting surgery with the possibility of participation of the whole team during the last year? (Indication discussion)                                                      | <input type="checkbox"/> | <input type="checkbox"/> | <input type="checkbox"/> |

|     |                                                                                                                                                                                                                         |                             |                          |                          |
|-----|-------------------------------------------------------------------------------------------------------------------------------------------------------------------------------------------------------------------------|-----------------------------|--------------------------|--------------------------|
| 4.  | Did your department hold regular case discussions of patients already operated on in the last year with the possibility of participation of the whole team? (Debriefing)                                                | <input type="checkbox"/>    | <input type="checkbox"/> | <input type="checkbox"/> |
| 5.  | Have you been assigned to "non-specialty" care for COVID-19 patients in other departments/wards for a period of at least one month?                                                                                     | <input type="checkbox"/>    | <input type="checkbox"/> | <input type="checkbox"/> |
| 5.1 | If applicable, how many months in total you were assigned there?                                                                                                                                                        | Please enter quantity here: |                          |                          |
| 6.  | Has your department had a team split of staff for at least one month in the last year?<br>(In each case, a team of physicians released from work who can step in within the working team in the event of an infection). | <input type="checkbox"/>    | <input type="checkbox"/> | <input type="checkbox"/> |
| 7.  | Were residents in your department able to complete their training last year only after a delay due to the pandemic, as no specialist examinations were offered temporarily?                                             | <input type="checkbox"/>    | <input type="checkbox"/> | <input type="checkbox"/> |

| <b>B) OR</b>                            |                                                                                                                                                                                             |                             |                          |                          |
|-----------------------------------------|---------------------------------------------------------------------------------------------------------------------------------------------------------------------------------------------|-----------------------------|--------------------------|--------------------------|
| 1.                                      | Did experienced surgeons (specialist, senior physician, chief) operate more frequently in your department in the last year due to time pressure?                                            | <input type="checkbox"/>    | <input type="checkbox"/> | <input type="checkbox"/> |
| 2.                                      | Have you had the opportunity to actively participate in surgeries in the past year?                                                                                                         | <input type="checkbox"/>    | <input type="checkbox"/> | <input type="checkbox"/> |
| 3.                                      | By what percentage (%) has your training in the OR changed in the last year? (If less: "- X%"; if more: "+ X%"; if no reduction, please specify "0%!")                                      | Please enter quantity here: |                          |                          |
| <b>C) Continuing medical education:</b> |                                                                                                                                                                                             |                             |                          |                          |
| 1.                                      | Has there has been a change in number of institutional educational didactics in your department in the last year compared to the previous year?                                             | <input type="checkbox"/>    | <input type="checkbox"/> | <input type="checkbox"/> |
| 1.1                                     | If applicable, by what percentage do you estimate these internal didactics have changed in the last year?<br>(If less: "- X%"; if more: "+ X%"; if no reduction, please specify "0%!")      | Please enter quantity here: |                          |                          |
| 1.2                                     | If applicable, what percentage of these internal didactics were cancelled without an auxiliary date last year?<br>(If less: "- X%"; if more: "+ X%"; if no reduction, please specify "0%!") | Please enter quantity here: |                          |                          |

|                              |                                                                                                                                                                         |                             |                          |                          |
|------------------------------|-------------------------------------------------------------------------------------------------------------------------------------------------------------------------|-----------------------------|--------------------------|--------------------------|
| 2.                           | Have you been unable to attend planned external medical education courses in the past year due to the pandemic (e.g., AE, ATLS, AO, or radiology courses)?              | <input type="checkbox"/>    | <input type="checkbox"/> | <input type="checkbox"/> |
| 2.1                          | If applicable, what percentage of these external medical education courses were cancelled last year without an auxiliary date?                                          | Please enter quantity here: |                          |                          |
| <b>D) Medial conferences</b> |                                                                                                                                                                         |                             |                          |                          |
| 1.                           | Have you attended conferences virtually in the last year?                                                                                                               | <input type="checkbox"/>    | <input type="checkbox"/> | <input type="checkbox"/> |
| 2.                           | In the past year, have any conferences you wanted to attend (physical or virtual) been canceled without an auxiliary date?                                              | <input type="checkbox"/>    | <input type="checkbox"/> | <input type="checkbox"/> |
| 3.                           | How many conferences were cancelled you planned to attend last year?                                                                                                    | Please enter quantity here: |                          |                          |
| <b>E) Research</b>           |                                                                                                                                                                         |                             |                          |                          |
| 1.                           | Did you have the opportunity to invest time in research projects last year?                                                                                             | <input type="checkbox"/>    | <input type="checkbox"/> | <input type="checkbox"/> |
| 1.2                          | If applicable, what percentage of your time could you invest in research projects?<br><b>(If less: "- X%"; if more: "+ X%"; if no reduction, please indicate "0%!")</b> | Please enter quantity here: |                          |                          |

|     |                                                                                                                                                         |                             |                          |                          |
|-----|---------------------------------------------------------------------------------------------------------------------------------------------------------|-----------------------------|--------------------------|--------------------------|
| 2.  | Was there a change in the number of research projects that were newly developed in your department last year compared to previous years?                | <input type="checkbox"/>    | <input type="checkbox"/> | <input type="checkbox"/> |
| 2.1 | If applicable, by what percentage did the number of research projects change? (If less: "- X%"; if more: "+ X%"; if no reduction, please specify "0%!") | Please enter quantity here: |                          |                          |
| 3.  | Were any ongoing studies that you were involved in paused last year due to the pandemic?                                                                | <input type="checkbox"/>    | <input type="checkbox"/> | <input type="checkbox"/> |

| II)                               | How do you rate the following statements?                                                                      | Totally agree            | Rather agree             | Neutral                  | Rather disagree          | Totally disagree         |
|-----------------------------------|----------------------------------------------------------------------------------------------------------------|--------------------------|--------------------------|--------------------------|--------------------------|--------------------------|
| <b>A) Clinic/Surgery/Research</b> |                                                                                                                |                          |                          |                          |                          |                          |
| 1.                                | Due to the limitations of the pandemic, I was set back in time in my general training (clinical and surgical). | <input type="checkbox"/> | <input type="checkbox"/> | <input type="checkbox"/> | <input type="checkbox"/> | <input type="checkbox"/> |
| 2.                                | Last year, my surgical training was slowed down due to the pandemic.                                           | <input type="checkbox"/> | <input type="checkbox"/> | <input type="checkbox"/> | <input type="checkbox"/> | <input type="checkbox"/> |
| 3.                                | In the last year, I have been able to advance my scientific career.                                            | <input type="checkbox"/> | <input type="checkbox"/> | <input type="checkbox"/> | <input type="checkbox"/> | <input type="checkbox"/> |

| <b>B) Medial conferences</b> |                                                                                                 |                          |                          |                          |                          |                          |
|------------------------------|-------------------------------------------------------------------------------------------------|--------------------------|--------------------------|--------------------------|--------------------------|--------------------------|
| 1.                           | In general, virtual conferences are a successful substitute for physical conferences.           | <input type="checkbox"/> | <input type="checkbox"/> | <input type="checkbox"/> | <input type="checkbox"/> | <input type="checkbox"/> |
| 2.                           | If I had the choice between a virtual and a physical conferences, I would prefer a virtual one. | <input type="checkbox"/> | <input type="checkbox"/> | <input type="checkbox"/> | <input type="checkbox"/> | <input type="checkbox"/> |
| 3.                           | My growth in knowledge is less at virtual conferences than at physical conferences.             | <input type="checkbox"/> | <input type="checkbox"/> | <input type="checkbox"/> | <input type="checkbox"/> | <input type="checkbox"/> |

| <b>III)</b> | <b>Give us a prospect on your future</b>                                                        | <b>Totally agree</b>     | <b>Rather agree</b>      | <b>Neutral</b>           | <b>Rather disagree</b>   | <b>Totally disagree</b>  |
|-------------|-------------------------------------------------------------------------------------------------|--------------------------|--------------------------|--------------------------|--------------------------|--------------------------|
| 1.          | I anticipate that my residency training will probably be extended due to the pandemic.          | <input type="checkbox"/> | <input type="checkbox"/> | <input type="checkbox"/> | <input type="checkbox"/> | <input type="checkbox"/> |
| 2.          | I expect to be clinically educated more extensively in the upcoming year compared to last year. | <input type="checkbox"/> | <input type="checkbox"/> | <input type="checkbox"/> | <input type="checkbox"/> | <input type="checkbox"/> |
| 3.          | I expect to receive more extensive surgical training in the upcoming year.                      | <input type="checkbox"/> | <input type="checkbox"/> | <input type="checkbox"/> | <input type="checkbox"/> | <input type="checkbox"/> |



| VIII) | In what type of facility are you currently (predominantly) employed?<br>(one answer) |                          |
|-------|--------------------------------------------------------------------------------------|--------------------------|
| 1.    | Basic and standard care clinic                                                       | <input type="checkbox"/> |
| 2.    | Clinic with focused care                                                             | <input type="checkbox"/> |
| 3.    | Maximum care clinic/university hospital                                              | <input type="checkbox"/> |
| 4.    | Rehabilitation clinic                                                                | <input type="checkbox"/> |
| 5.    | Other                                                                                | <input type="checkbox"/> |
